# Supplementary material for: Large-leaf yellow tea attenuates high glucose-induced vascular endothelial cell injury by up-regulating autophagy and down-regulating oxidative stress
Source: Royal Society of Chemistry journal article supplement (doi:10.1039/d1fo03405g), 2022-01-01
Supplement: d1fo03405g2.pdf [file d1fo03405g2.pdf]

## Supplementary information

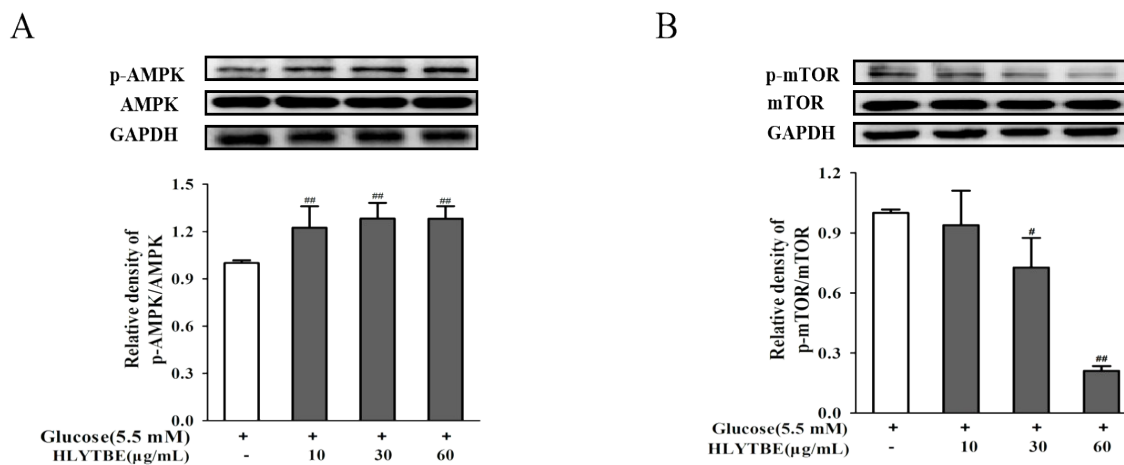

**Fig. S2 Effect of HLYTBE on the AMPK/mTOR signalling pathway in HUVECs.**

The cells were co-cultured with HLYTBE (10, 30, and 60 μg/mL) in the presence of D-glucose (5.5 mM) for 48 h. The levels of p-AMPK (A) and p-mTOR (B) were determined by western blot analysis. The results are presented as mean ± SEM (n =3).

#  $P < 0.05$ , ##  $P < 0.01$  vs. untreated group.
