# Supplementary material for: Large-leaf yellow tea attenuates high glucose-induced vascular endothelial cell injury by up-regulating autophagy and down-regulating oxidative stress
Source: Royal Society of Chemistry journal article supplement (doi:10.1039/d1fo03405g), 2022-01-01
Supplement: d1fo03405g3.pdf [file d1fo03405g3.pdf]

**Supplementary Table 1. Content of nine flavonoid glycosides in HLYTBE**

| <b>Flavonoid glycosides</b>          | <b>HLYTBE (mg/g)</b> |
|--------------------------------------|----------------------|
| vitexin 4''-O-Glc                    | 0.14 ± 0.002         |
| Q 3-O-Glc-Rha-Glc                    | 9.02 ± 0.074         |
| K 3-O-Glc-Rha-Glc                    | 23.30 ± 0.691        |
| K 3-O-Glc-Rha                        | 5.64 ± 0.144         |
| K 3-O-Glc                            | 0.42 ± 0.006         |
| Q 3-O- <i>p</i> -Cou-Glc-Ara-Rha-Glc | 2.31 ± 0.059         |
| K 3-O- <i>p</i> -Cou-Glc-Ara-Rha-Glc | 1.17 ± 0.054         |
| Q 3-O- <i>p</i> -Cou-Glc-Rha-Glc     | 0.94 ± 0.010         |
| K 3-O- <i>p</i> -Cou-Glc-Rha-Glc     | 0.25 ± 0.004         |

HLYTBE, n-butanol fraction of Huoshan large-leaf yellow tea extract; Q, quercetin;

K, kaempferol. Results of three experiments are presented as mean ± SD.
