# Supplementary material for: Large-leaf yellow tea attenuates high glucose-induced vascular endothelial cell injury by up-regulating autophagy and down-regulating oxidative stress
Source: Royal Society of Chemistry journal article supplement (doi:10.1039/d1fo03405g), 2022-01-01
Supplement: d1fo03405g4.pdf [file d1fo03405g4.pdf]

**Supplementary Table 2. Content of ten major tea polyphenols and caffeine in HLYTBE**

| <b>Tea polyphenols</b>                | <b>HLYTBE (mg/g)</b> |
|---------------------------------------|----------------------|
| gallocatechin                         | 9.32 ± 0.934         |
| caffeine                              | 43.06 ± 0.874        |
| epigallocatechin                      | 35.76 ± 0.162        |
| catechin                              | 11.58 ± 0.500        |
| epicatechin                           | 12.38 ± 0.567        |
| epigallocatechin gallate              | 20.80 ± 0.615        |
| gallocatechin gallate                 | 3.86 ± 0.156         |
| epigallocatechin gallate 3''-O-methyl | 4.29 ± 0.266         |
| epicatechin gallate                   | 11.72 ± 0.700        |
| catechin gallate                      | 1.53 ± 0.025         |
| epicatechin gallate 3''-O-methyl      | 0.31 ± 0.002         |

HLYTBE, n-butanol fraction of Huoshan large-leaf yellow tea extract. Results of three experiments are presented as mean ± SD.
